# Supplementary material
Source: PubMed Central journal article supplement (PMC5468632)
Supplement: pnas.1701280114.sapp.pdf [file pnas.1701280114.sapp.pdf]

# Confined catalysis under two-dimensional materials

Haobo Li, Jianping Xiao, Qiang Fu,<sup>1</sup> Xinhe Bao

State Key Laboratory of Catalysis, iChEM, Dalian Institute of Chemical Physics,  
Chinese Academy of Sciences, Dalian 116023, P. R. China

<sup>1</sup>To whom correspondence should be addressed. Email: [qfu@dicp.ac.cn](mailto:qfu@dicp.ac.cn).

## Computational details

Theoretical calculations were performed using Vienna *ab initio* simulation packages (VASP)<sup>1</sup> with the projector-augmented wave (PAW) scheme<sup>2</sup>. We used the Perdew-Burke-Ernzerhof (PBE)<sup>3</sup> functional at the level of the Generalized Gradient Approximation (GGA) for electronic exchange-correlation interactions. The plane wave cutoff was set to 400 eV. In addition, the weak van der Waals (vdW) interactions were corrected in the form of  $C^6/R^6$  pair potentials (PBE-D), where  $C^6$  and the vdW radius,  $R^0$ , were set as shown in the table below:

|                                               |       |       |       |       |       |       |       |
|-----------------------------------------------|-------|-------|-------|-------|-------|-------|-------|
| Element                                       | Pt    | C     | H     | N     | O     | S     | Li    |
| $C^6$ (J·nm <sup>6</sup> ·mol <sup>-1</sup> ) | 24.67 | 1.75  | 0.14  | 1.23  | 0.70  | 5.57  | 1.61  |
| $R^0$ (Å)                                     | 1.75  | 1.452 | 1.001 | 1.397 | 1.342 | 1.683 | 0.825 |
| Element                                       | Na    | K     | Rb    | Cs    | B     | Zn    |       |
| $C^6$ (J·nm <sup>6</sup> ·mol <sup>-1</sup> ) | 5.71  | 10.80 | 24.67 | 24.67 | 3.13  | 10.80 |       |
| $R^0$ (Å)                                     | 1.144 | 1.485 | 1.628 | 1.628 | 1.485 | 1.562 |       |

The Brillouin zone was sampled by a  $6\times 6\times 1$   $k$ -point grid for the calculations of charge density and local potential, and a  $2\times 2\times 1$  Monkhorst-Pack<sup>4</sup>  $k$ -point grid for structural optimizations. The convergence of energy and forces were set to  $1\times 10^{-5}$  eV and  $0.05$  eV·Å<sup>-1</sup>.

For graphene/Pt(100) surface, A  $3\times 3$  Pt(111) supercell with  $3\times 2\sqrt{3}$  graphene

overlayer was used as a simplified model for calculations. For graphene/Pt(110) surface, A  $2 \times 3$  Pt(110) supercell with  $3 \times 2\sqrt{3}$  graphene overlayer was used for calculations.

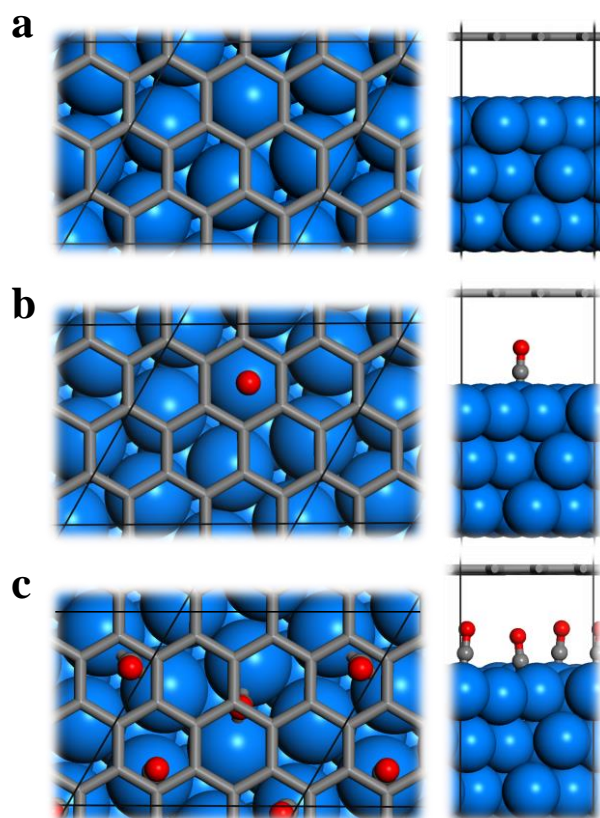

**Figure S1.** Atomic structure diagrams of the calculation models used in this work. a) Graphene (Gr) covered Pt(111). b-c) CO adsorption at the interface of Gr/Pt(111) at the coverage of 1/7 ML (b) and 3/7 ML (c).

**Table S1.** Comparison of different vdW correction methods, as well as without vdW corrections, for the Gr/CO/Pt(111) system.

| Method                                 | $E_{\text{ad}}(\text{CO})$ | $E_{\text{ad}}(\text{CO})$ | $E_{\text{con}}$ | Gr-Pt<br>distance | Gr-CO-Pt<br>distance |
|----------------------------------------|----------------------------|----------------------------|------------------|-------------------|----------------------|
|                                        | (bare surface)             | (with graphene)            |                  |                   |                      |
| vdW-D2 <sup>5</sup>                    | -2.02 eV                   | -0.61 eV                   | 1.41 eV          | 3.2 Å             | 5.7 Å                |
| vdW-D3 <sup>6</sup>                    | -2.06 eV                   | -0.57 eV                   | 1.49 eV          | 3.2 Å             | 5.7 Å                |
| vdW-DF opt-<br>B88 <sup>7,8,9,10</sup> | -1.95 eV                   | -0.88 eV                   | 1.07 eV          | 3.3 Å             | 5.7 Å                |
| w/o vdW                                | -1.75 eV                   | -1.63 eV                   | 0.12 eV          | 4.2 Å             | 5.9 Å                |

**Table S2.** The adsorption energies of CO at the interface of Gr/Pt(100) and Gr/Pt(110), as well as the adsorption energy difference.

| Adsorption<br>surface | Adsorption<br>site | Adsorption energy (eV) |         |          | Coverage<br>(ML) | Gr-height (Å) |          |
|-----------------------|--------------------|------------------------|---------|----------|------------------|---------------|----------|
|                       |                    | Bare surface           | With Gr | $\Delta$ |                  | Gr/Pt         | Gr/CO/Pt |
| <b>Gr/Pt(100)</b>     | Top                | -1.88                  | -0.04   | 1.84     | 1/9              | 3.18          | 5.65     |
| <b>Gr/Pt(110)</b>     | Top                | -2.46                  | 1.29    | 3.75     | 1/6              | 2.25          | 5.49     |

**Table S3.** The adsorption energies of CO at the interface of Gr/Pt(111) with different adsorption sites at 1/7 ML coverage.

| Adsorption site     | Adsorption energy (eV) |         |  | $\Delta$ | Gr-height (Å) |          |
|---------------------|------------------------|---------|--|----------|---------------|----------|
|                     | Bare surface           | With Gr |  |          | Gr/Pt         | Gr/CO/Pt |
| <b>Top</b>          | -2.02                  | -0.61   |  | 1.41     | 3.27          | 5.73     |
| <b>Bridge</b>       | -2.15                  | -0.82   |  | 1.33     | 3.27          | 5.61     |
| <b>Hollow (FCC)</b> | -2.22                  | -0.94   |  | 1.28     | 3.27          | 5.51     |

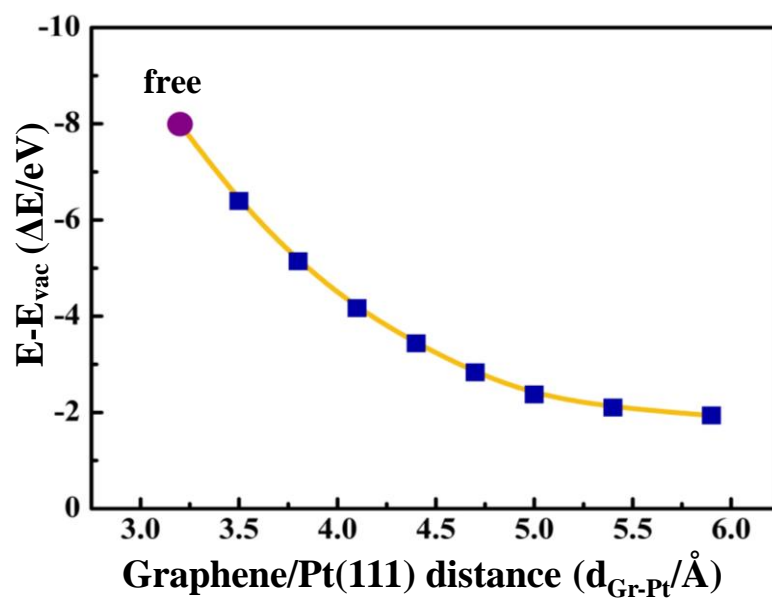

**Figure S2.** The maximum potential energy between Gr and Pt(111) (corresponding to the energies at the positions marked by orange dots in Fig. 3a) as a function of  $d_{\text{Gr-Pt}}$ .

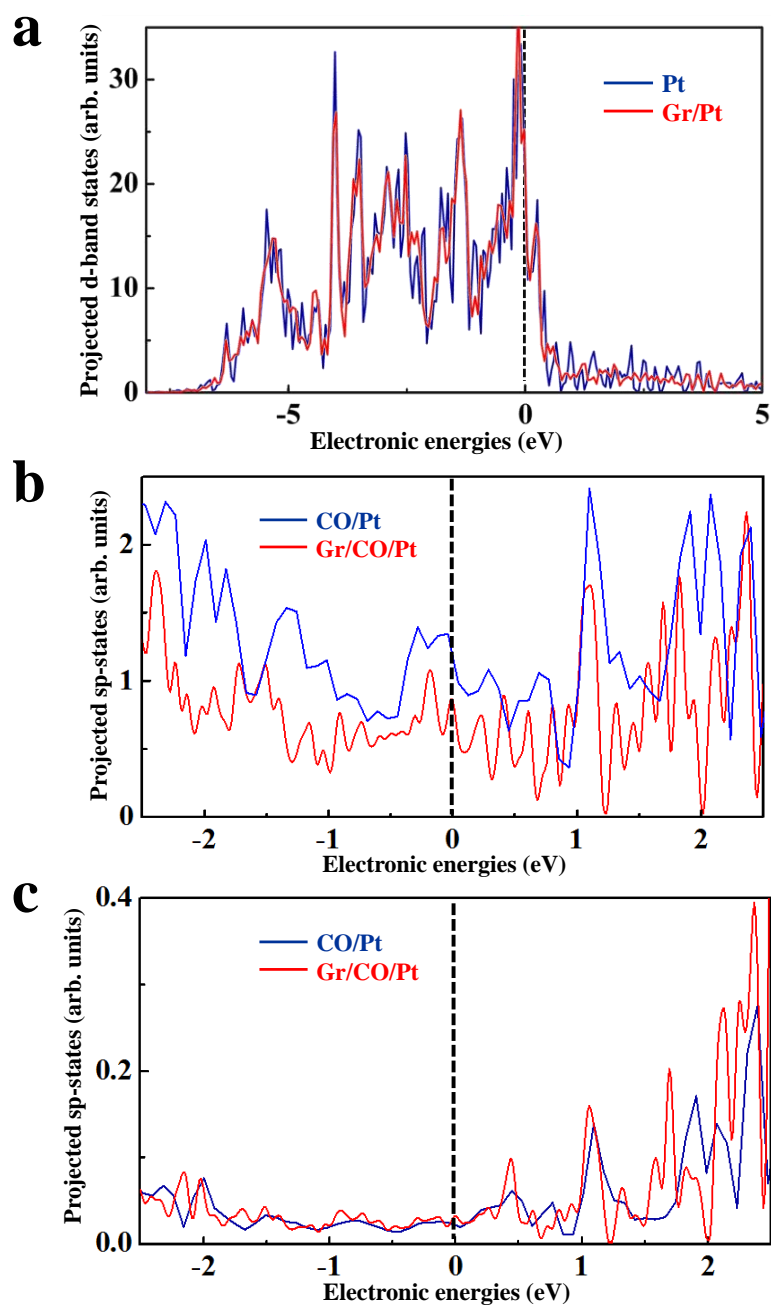

**Figure S3.** a) Projected d-band states of Pt atoms of bare Pt(111) surface (blue) and Gr/Pt(111) interface (red). b) Projected sp-states of Pt atoms of CO/Pt(111) (blue) and Gr/CO/Pt(111) (red) structures. c) Projected sp-states of CO molecules of CO/Pt(111) (blue) and Gr/CO/Pt(111) (red) structures. The Fermi level is set to 0 eV as shown in dashed line.

**Table S4.** The adsorption sites and adsorption energies of different adsorbates (non-metal atoms, molecules, alkali metal atoms) on bare Pt(111) surface and Gr/Pt(111) surface at 1/7 ML coverage, as well as the adsorption energy difference, the Gr height of the Gr/Pt(111) surface at full relaxation, the bond length of atoms or molecules with Pt(111) and the bond length of the adsorbed molecules.

| Adsorbate        | Adsorption site |       | Adsorption energy (eV) |       |          | Gr-height | Bind length (Å) |       |
|------------------|-----------------|-------|------------------------|-------|----------|-----------|-----------------|-------|
|                  | Pt              | Gr/Pt | Pt                     | Gr/Pt | $\Delta$ | (Å)       | Pt              | Gr/Pt |
| H atom           | Top             | Fcc   | -0.58                  | -0.49 | 0.09     | 3.26      | 1.56            | 1.80  |
| C atom           | Fcc             | Fcc   | -7.59                  | -7.35 | 0.24     | 3.40      | 1.90            | 1.90  |
| N atom           | Fcc             | Fcc   | -0.00                  | 0.30  | 0.30     | 3.38      | 1.95            | 1.93  |
| O atom           | Fcc             | Fcc   | -1.43                  | -1.08 | 0.35     | 3.45      | 2.04            | 2.02  |
| S atom           | Fcc             | Fcc   | -2.13                  | -1.18 | 0.95     | 4.18      | 2.26            | 2.24  |
| CO               | Top             | Top   | -2.02                  | -0.61 | 1.41     | 5.73      | 1.84            | 1.83  |
| NO               | Fcc             | Fcc   | -2.29                  | -1.00 | 1.28     | 5.12      | 2.07            | 2.09  |
| H <sub>2</sub> O | Top             | Top   | -0.52                  | 0.59  | 1.11     | 4.97      | 2.32            | 2.23  |
| NH <sub>3</sub>  | Top             | Top   | -1.37                  | -0.19 | 1.18     | 5.56      | 2.10            | 2.10  |
| Li atom          | Fcc             | Fcc   | -1.90                  | -2.06 | 0.16     | 3.69      | ---             | ---   |
| Na atom          | Fcc             | Fcc   | -1.37                  | -2.09 | 0.72     | 4.50      | ---             | ---   |
| K atom           | Fcc             | Fcc   | -1.34                  | -2.47 | 1.13     | 5.45      | ---             | ---   |
| Rb atom          | Fcc             | Fcc   | -1.52                  | -2.66 | 1.13     | 5.85      | ---             | ---   |
| Cs atom          | Fcc             | Fcc   | -1.61                  | -2.88 | 1.26     | 6.10      | ---             | ---   |

**Table S5.** The adsorption sites and adsorption energies of different adsorbates (non-metal atoms, molecules, alkali metal atoms) on bare Pt(111) surface and Gr/Pt(111) surface at 3/7 ML coverage, as well as the adsorption energy difference, the Gr height of the Gr/Pt(111) surface at full relaxation, the bind length of atoms or molecules with Pt(111) and the bond length of the adsorbed molecules. (a: two molecules at Bridge site and one molecule at Fcc site in one unit cell; b: one molecule at Bridge site and two molecules at Fcc site in one unit cell)

| Adsorbate | Adsorption site   |                   | Adsorption energy (eV) |       |          | Gr-height | Bind length (Å) |       |
|-----------|-------------------|-------------------|------------------------|-------|----------|-----------|-----------------|-------|
|           | Pt                | Gr/Pt             | Pt                     | Gr/Pt | $\Delta$ | (Å)       | Pt              | Gr/Pt |
| H atom    | Fcc               | Fcc               | -0.56                  | -0.48 | 0.08     | 3.40      | 1.56            | 1.85  |
| C atom    | Fcc               | Fcc               | -7.02                  | -6.78 | 0.16     | 3.86      | 1.92            | 1.92  |
| N atom    | Fcc               | Fcc               | 0.64                   | 0.82  | 0.18     | 3.85      | 1.97            | 1.97  |
| O atom    | Fcc               | Fcc               | -1.04                  | -0.84 | 0.20     | 3.88      | 2.05            | 2.04  |
| S atom    | Fcc               | Fcc               | -1.09                  | -0.77 | 0.32     | 4.73      | 2.31            | 2.31  |
| CO        | 2B1F <sup>a</sup> | 1B2F <sup>b</sup> | -1.94                  | -1.50 | 0.44     | 5.89      | 2.06            | 2.10  |
| NO        | Fcc               | Fcc               | -1.87                  | -1.47 | 0.40     | 5.39      | 2.10            | 2.09  |
| Li atom   | Fcc               | Fcc               | -1.86                  | -1.72 | -0.14    | 4.04      | ---             | ---   |
| Na atom   | Fcc               | ~Fcc              | -1.61                  | -1.63 | 0.02     | 4.90      | ---             | ---   |
| K atom    | Fcc               | Fcc               | -1.63                  | -1.67 | 0.04     | 5.63      | ---             | ---   |
| Rb atom   | Fcc               | Fcc               | -1.79                  | -1.81 | 0.02     | 5.88      | ---             | ---   |
| Cs atom   | Fcc               | Fcc               | -1.77                  | -1.93 | 0.16     | 6.18      | ---             | ---   |



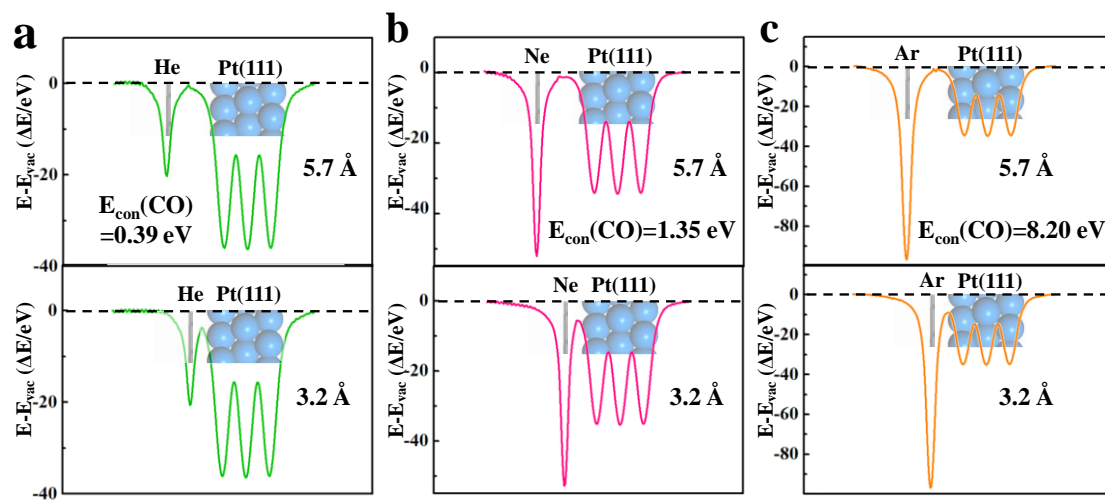

**Figure S4.** One-dimensional local potential energies of a) He/Pt(111), b) Ne/Pt(111), and c) Ar/Pt(111) interfaces with the overlayer-surface distance at 5.7 Å (above) and 3.2 Å (below), respectively. The corresponding schematic atomic structures in the real space are shown as the semitransparent insets.

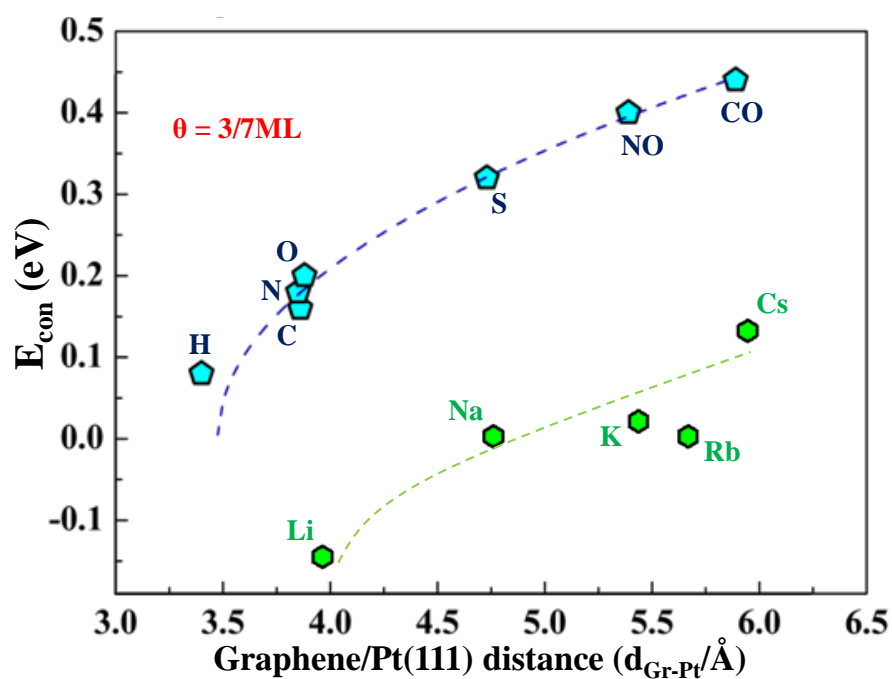

**Figure S5.** Confinement energies of a series of non-metal atoms and small molecules (blue dots) together with alkali metal atoms (green dots) at 3/7 ML coverage, and their relationship with the Gr/Pt(111) distance at full optimal relaxation. The blue dots and green dots are fitted in blue and green dashed lines, respectively, which is just 1/3 of the pink dashed line in Fig. 4a. The blue dots fit the curve well with a little lower than the curve, which is supposed to be due to the slight charge transfer between intercalation species and the Gr layer.

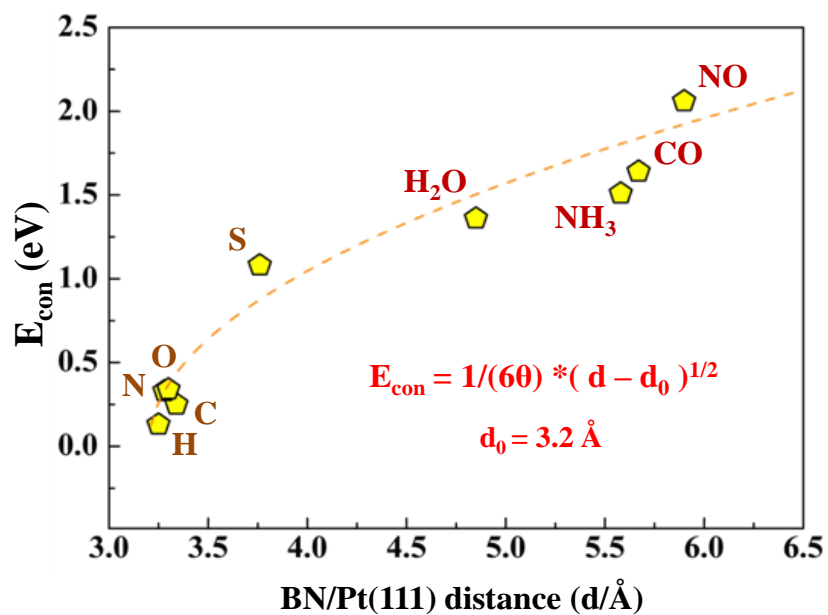

**Figure S6.** Confinement energies of a series of non-metal atoms and small molecules at 1/7 ML coverage, and their relationship with the h-BN/Pt(111) distance at full optimal relaxation. The curve plotted using an exponential function (in red) is shown as the yellow dashed line.

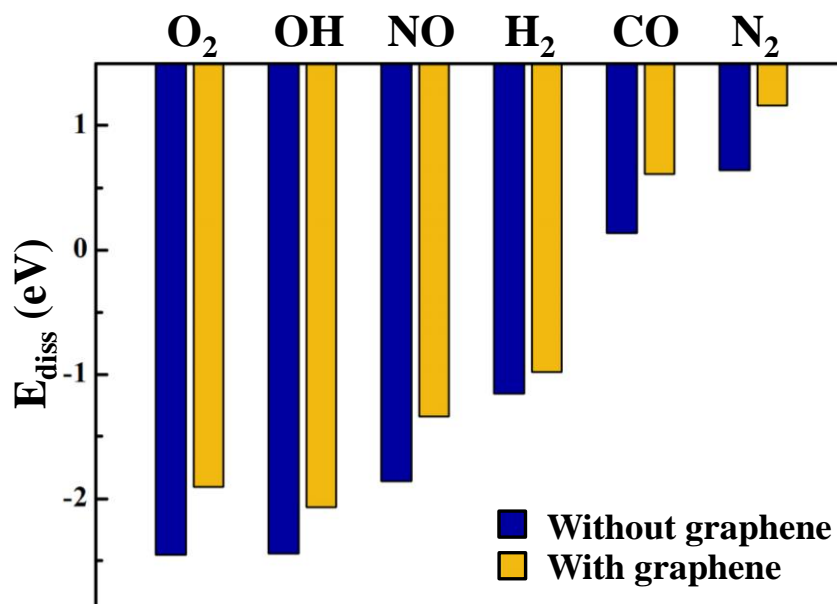

**Figure S7.** Dissociative binding energies of O<sub>2</sub>, OH, NO, H<sub>2</sub>, CO, and N<sub>2</sub> molecules on Gr/Pt(111) (yellow) in comparison to those on bare Pt(111) surface (blue).

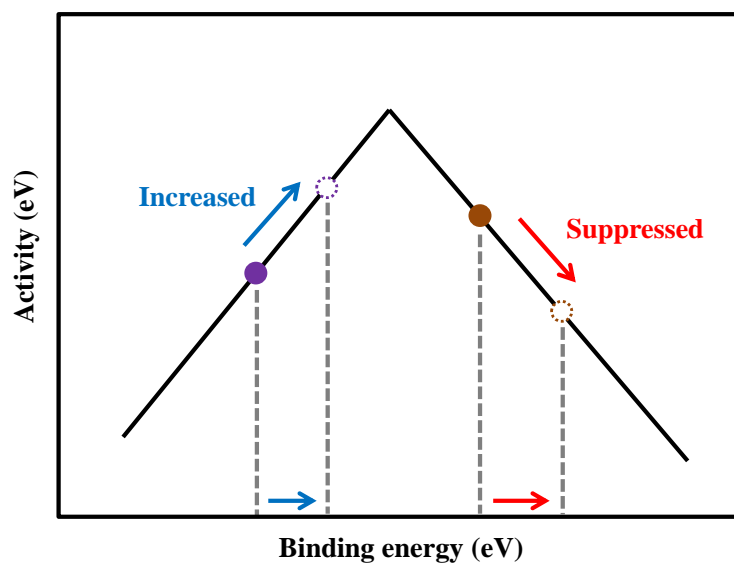

**Figure S8.** Schematic diagram of a volcano curve for catalytic reactions. The catalytic activity can be increased or suppressed when the binding energy of adsorbates on a catalyst surface is modulated.

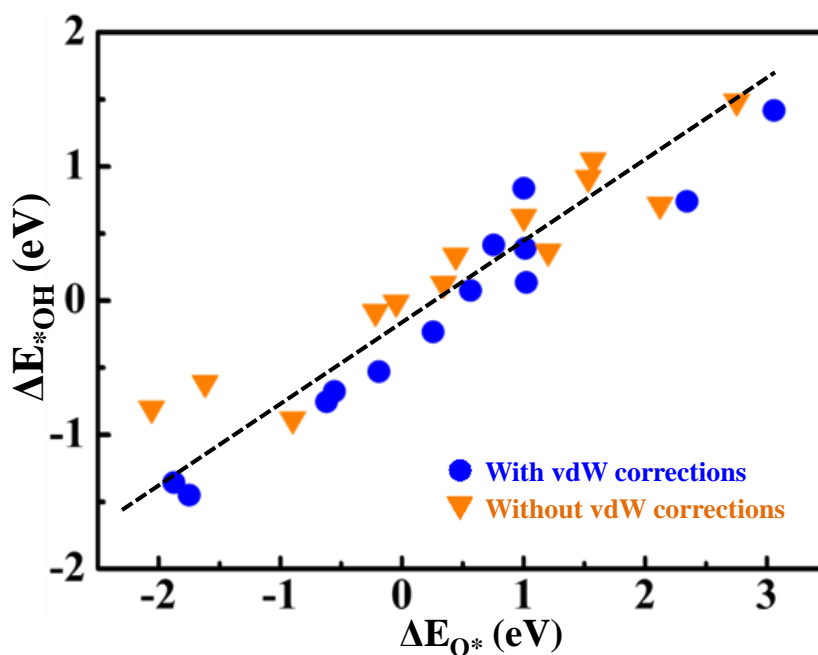

**Figure S9.** Linear relation between the binding energy of O\* ( $\Delta E_{O^*}$ ) and \*OH ( $\Delta E_{*OH}$ ) on different metals with or without vdW corrections (over the most close packed surface, at 1/4 ML coverage). The corresponding metals and values of each point are listed in Table S6. The data without vdW corrections are cited from the literature by Nørskov et al.<sup>11</sup>

**Table S6.** Corresponding metals and values of each point in Fig. S9. The data without vdW corrections are cited from the literature by Norskov et al.<sup>11</sup>

| Metal     | $\Delta E_{O^*}$ | $\Delta E_{*OH}$ | $\Delta E_{O^*}$ | $\Delta E_{*OH}$ |
|-----------|------------------|------------------|------------------|------------------|
|           | (with vdW)       | (with vdW)       | (without vdW)    | (without vdW)    |
| <b>Ag</b> | 0.72             | 2.12             | 0.74             | 2.34             |
| <b>Au</b> | 1.49             | 2.75             | 1.41             | 3.06             |
| <b>Co</b> | -0.08            | -0.22            | -0.76            | -0.62            |
| <b>Cu</b> | 0.37             | 1.20             | 0.13             | 1.02             |
| <b>Fe</b> | -0.88            | -0.90            | -0.68            | -0.55            |
| <b>Ir</b> | 0.63             | 1.00             | 0.41             | 0.75             |
| <b>Mo</b> | -0.61            | -1.62            | -0.45            | -1.75            |
| <b>Ni</b> | 0.13             | 0.34             | -0.53            | -0.19            |
| <b>Pd</b> | 0.92             | 1.53             | 0.38             | 1.01             |
| <b>Pt</b> | 1.05             | 1.57             | 0.83             | 1.00             |
| <b>Rh</b> | 0.34             | 0.44             | 0.07             | 0.56             |
| <b>Ru</b> | -0.01            | -0.05            | -0.24            | 0.26             |
| <b>W</b>  | -0.80            | -2.06            | -1.36            | -1.87            |

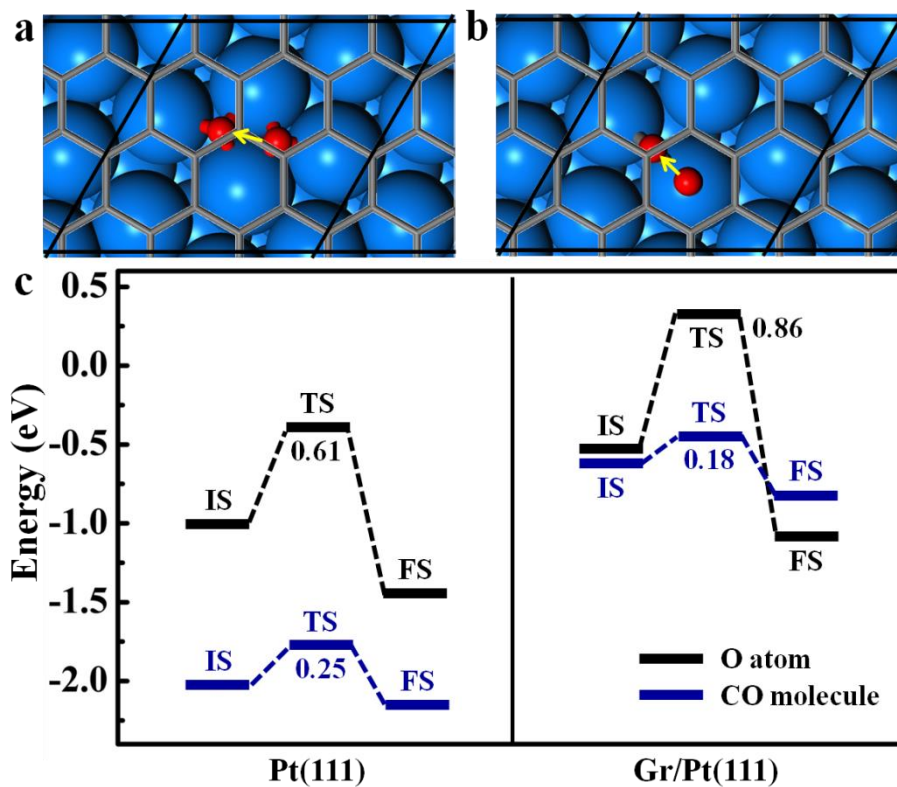

**Figure S10.** (a-b) Schematic diffusion process of adsorbed species at the interface of Gr/Pt(111): (a) O atom (from fcc site to hcp site); (b) CO molecule (from top site to bridge site). Pt: light blue balls; C: grey sticks or balls; O: red balls. The diffusion steps of initial states (IS) to final states (FS) are shown in yellow arrows. (c) Diffusion barriers of the process on Pt(111) (left side) and Gr/Pt(111) (right side). Black lines: O atom; blue lines: CO molecule.

---

## References

- [1] Kresse G, Furthmüller J (1996) Efficient iterative schemes for *ab initio* total-energy calculations using a plane-wave basis set. *Phys. Rev. B* 54(16):11169.
- [2] Blöchl PE (1994) Projector augmented-wave method. *J. Phys. Rev. B* 50(24):17953.
- [3] Perdew JP, Burke K, Ernzerhof M (1996) Generalized gradient approximation made simple. *Phys. Rev. Lett.* 77(18):3865.
- [4] Monkhorst HJ, Pack JD (1976) Special points for Brillouin-zone integrations. *Phys. Rev. B: Solid State* 13(12):5188-5192.
- [5] Grimme S (2006) Semiempirical GGA-type density functional constructed with a long-range dispersion correction. *J. Comp. Chem.* 27(15):1787-1799.
- [6] Grimme S, Antony J, Ehrlich S, Krieg H (2010) A consistent and accurate *ab initio* parametrization of density functional dispersion correction (DFT-D) for the 94 elements H-Pu. *J. Chem. Phys.* 132(15):154104.
- [7] Dion M, Rydberg H, Schröder E, Langreth DC, Lundqvist BI (2005) Van der Waals density functional for general geometries. *Phys. Rev. Lett.* 92(24):246401.
- [8] Román-Pérez G, Zamora F, Soler JM (2010) Hollow C<sub>3</sub>N<sub>4</sub> nanoclusters from first principles. *Phys. Rev. B.* 82(19):195405.
- [9] Klimeš J, Bowler DR, Michaelides A (2011) Van der Waals density functional applied to solids. *Phys. Rev. B.* 83(19):195131.
- [10] Klimeš J, Bowler DR, Michaelides A (2010) A critical assessment of theoretical methods for finding reaction pathways and transition states of surface processes. *J. Phys.: Cond. Matt.* 22(7):022201.
- [11] Nørskov JK, Rossmeisl J, Logadottir A, Lindqvist L, Kitchin JR, Bligaard T, Jonsson H (2004) Origin of the overpotential for oxygen reduction at a fuel-cell cathode. *J. Phys. Chem. B* 108(46):17886-17892.
